# Supplementary material for: FADD regulates NF-κB activation and promotes ubiquitination of cFLIPL to induce apoptosis
Source: PubMed Central journal article supplement (PMC4789601; doi:10.1038/srep22787), 2016-03-14
Supplement: srep22787-s1.pdf [file srep22787-s1.pdf]

1  
2  
3  
4  
5  
6  
7  
8  
9  
10  
11  
12  
13  
14  
15  
16  
17  
18  
19  
20  
21

**Supporting Information**

**FADD regulates NF- $\kappa$ B activation and promotes ubiquitination of cFLIP<sub>L</sub> to induce apoptosis**

Kishu Ranjan and Chandramani Pathak\*

Department of Cell Biology, School of Biological Sciences and Biotechnology, Indian Institute of Advanced Research, Koba Institutional Area, Gandhinagar-382007, Gujarat, India.

\*Corresponding authors: Chandramani Pathak, Department of Cell Biology, School of Biological Sciences and Biotechnology, Indian Institute of Advanced Research, Koba Institutional Area, Gandhinagar-382007, Gujarat, India. Tel: +91-79-60514244, Fax: +91-79-30514110

E-mail: cmpathak@iiar.res.in

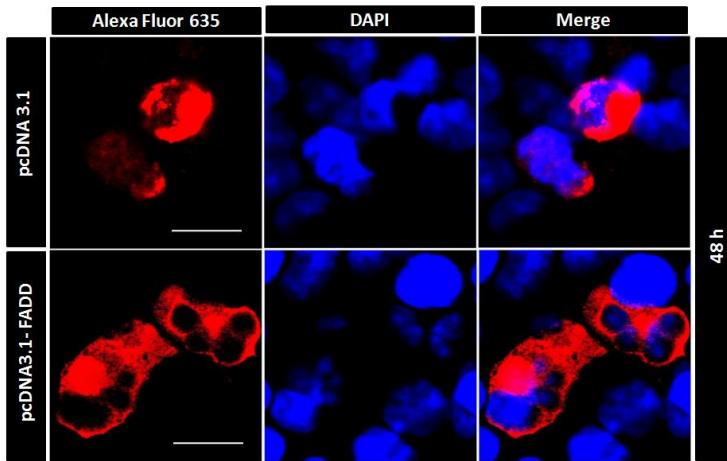

(a)

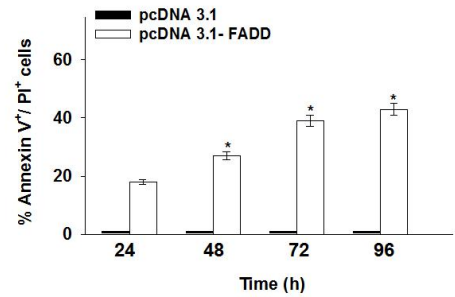

(b)

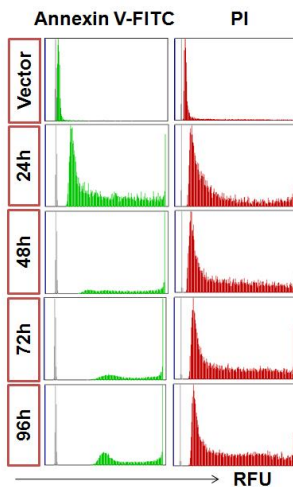

(c)

22 **Figure S1. Expression of FADD in HEK 293T cells** (a) Immunostaining of FADD in vector  
 23 transfected cells (endogenous) and pcDNA-FADD transfected cells, post 48 h of incubation,  
 24 scale bar- 10 $\mu$ m. The pcDNA-FADD was overexpressed for 24-96 h and (b) Percent apoptotic  
 25 cell death (Annexin-V<sup>+</sup>/PI<sup>+</sup>) (c) and Annexin-V /PI staining were analyzed by Tali cytometer,  
 26 control represents vector transfected cells. Error bars represent mean $\pm$ SD, \*P  $\leq$ 0.05, n  $\geq$  3, where  
 27 n is number of independent experiment.

28

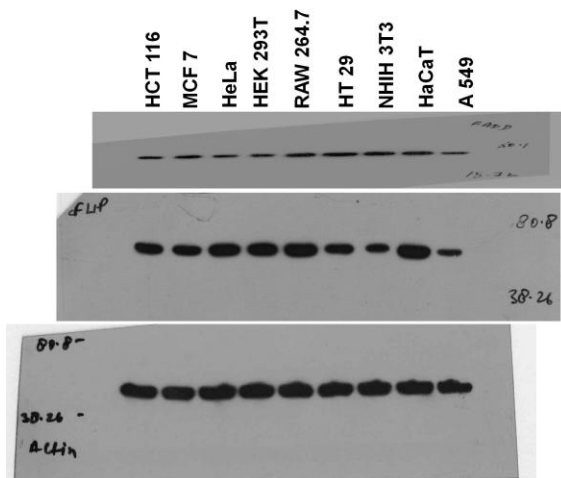

(c)

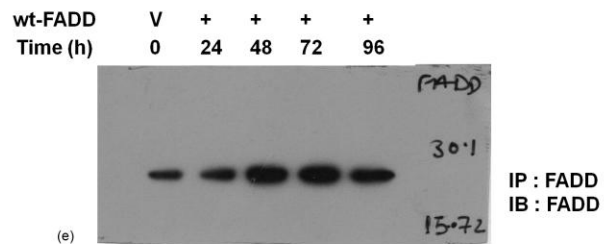

(e)

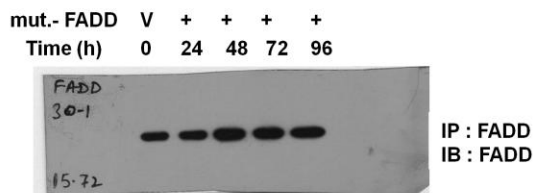

(f)

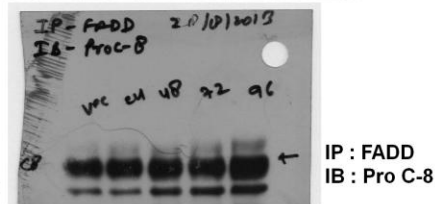

29

30 **Figure S2.** The uncropped full-length image of western blot results for Figure 1c, e & f. The  
 31 chemiluminescent signals from the exposed membrane were recorded on X-ray films.

32

33

34

35

36

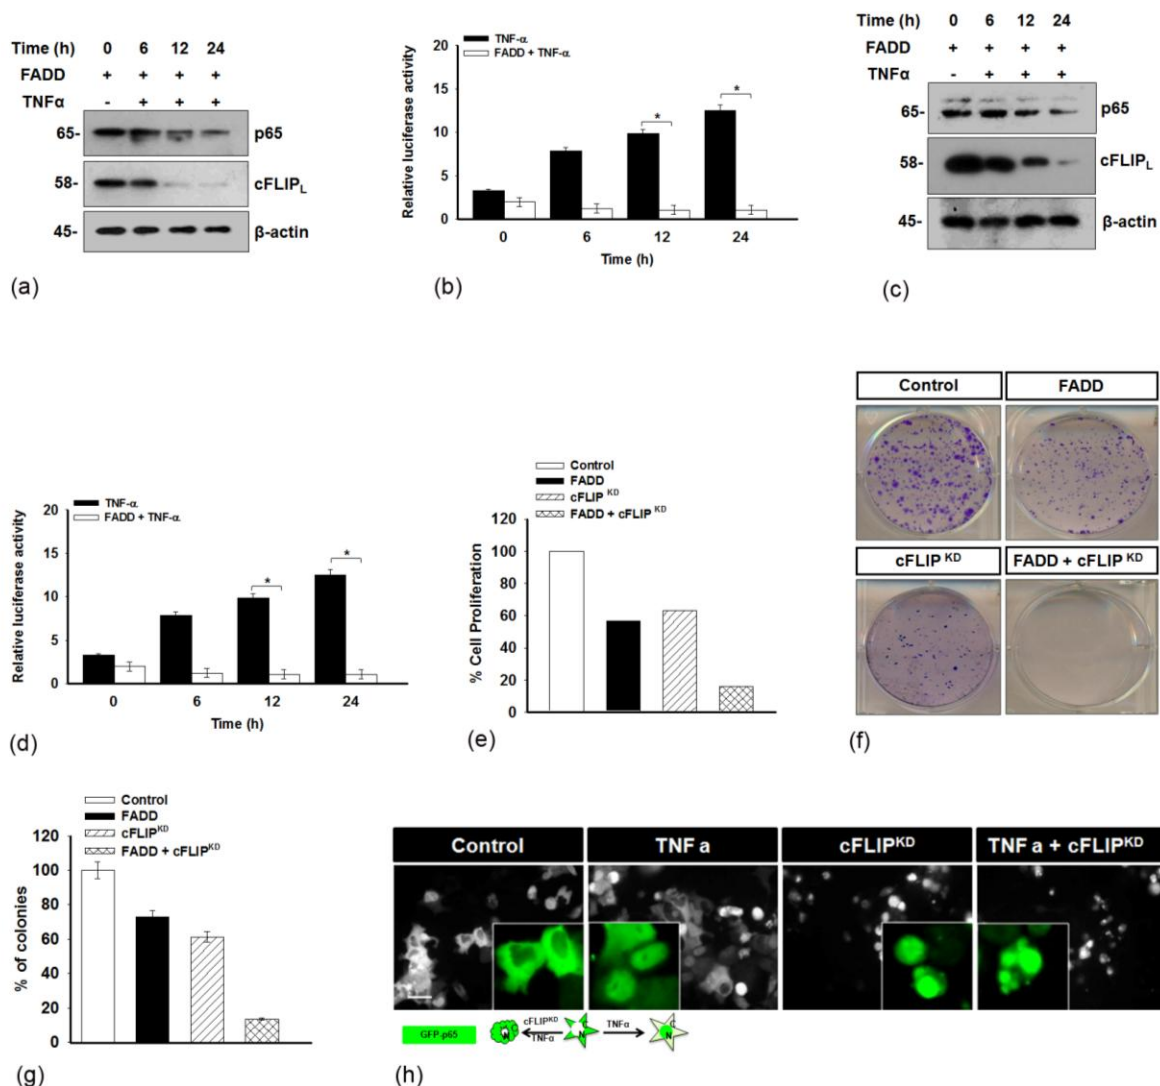

37 **Figure S3. FADD regulates pro-survival response of TNF- $\alpha$  stimulation.** TNF- $\alpha$  (10 ng/ml)  
 38 stimulation to MCF-7 and 48 h of pcDNA-FADD expressed MCF-7 cells to monitor the (a)  
 39 Expression of p65 and cFLIP<sub>L</sub> and (b) NF- $\kappa$ B luciferase reporter activity, TNF- $\alpha$  untreated MCF-  
 40 7 cells and 48 h of pcDNA-FADD expressed MCF-7 cells (shown as 0 h time point) were taken  
 41 as control.. TNF- $\alpha$  (10 ng/ml) stimulation to HCT 116 and 48 h of pcDNA-FADD expressed  
 42 HCT 116 cells to monitor the (c) Expression of p65 and cFLIP<sub>L</sub> and (d) NF- $\kappa$ B luciferase  
 43 reporter activity, TNF- $\alpha$  untreated HCT 116 cells and 48 h of pcDNA-FADD expressed HCT  
 44 116 cells (shown as 0 h time point) were taken as control. The uncropped full-length blots are

45 presented in supplementary Figure S4. HEK 293T cells were transfected with; pcDNA-FADD;  
 46 (column 2), siRNA directed against cFLIP<sub>L</sub> (cFLIP<sub>L</sub><sup>KD</sup>; column 3) and pcDNA-FADD together  
 47 with siRNA-cFLIP<sub>L</sub> (FADD + cFLIP<sub>L</sub><sup>KD</sup>; column 4). Post 48 h of incubation cells were subjected  
 48 to monitor (e) Percent cell proliferation, (f) Colony forming assay, (g) Percent crystal violet  
 49 stained colonies and (h) p65 translocation assay, scale bar- 5µm. The vector and non targeting  
 50 siRNA transfected cells were taken as a control. Error bars represent mean±SD, \*P ≤0.05, n ≥ 3,  
 51 where n is number of independent experiment.

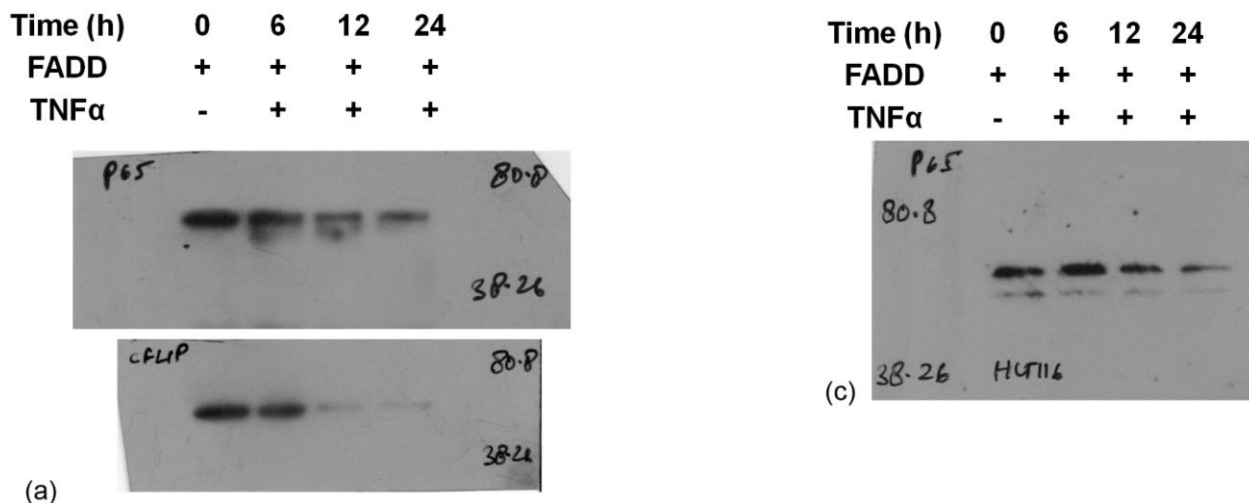

52 **Figure S4.** The uncropped full-length image of western blot results for Figure S3a & c. The  
 53 chemiluminescent signals from the exposed membrane were recorded on X-ray films.

54

55

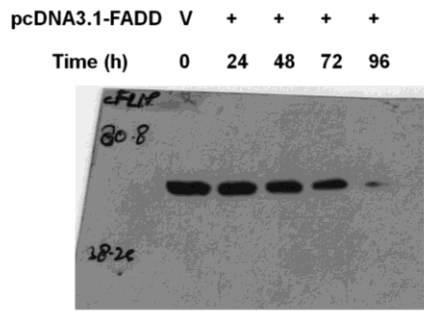

(a)

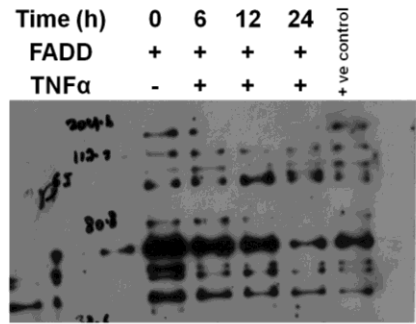

(c)

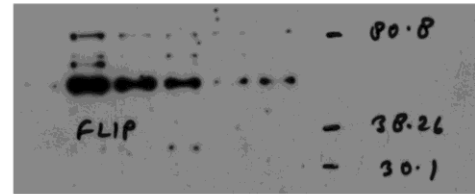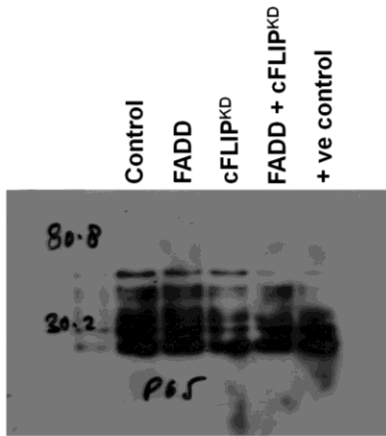

(g)

56 **Figure S5.** The uncropped full-length image of western blot results for Figure 2a, c & g. The positive  
 57 control represents I $\kappa$ B $\alpha$  (inhibitor of NF- $\kappa$ B) transfected HEK 293T cells, post 48 h of incubation. The  
 58 chemiluminescent signals from the exposed membrane were recorded on X-ray films.

59

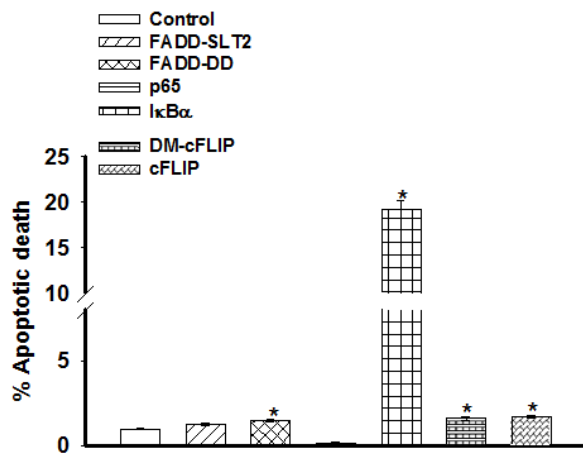

(a)

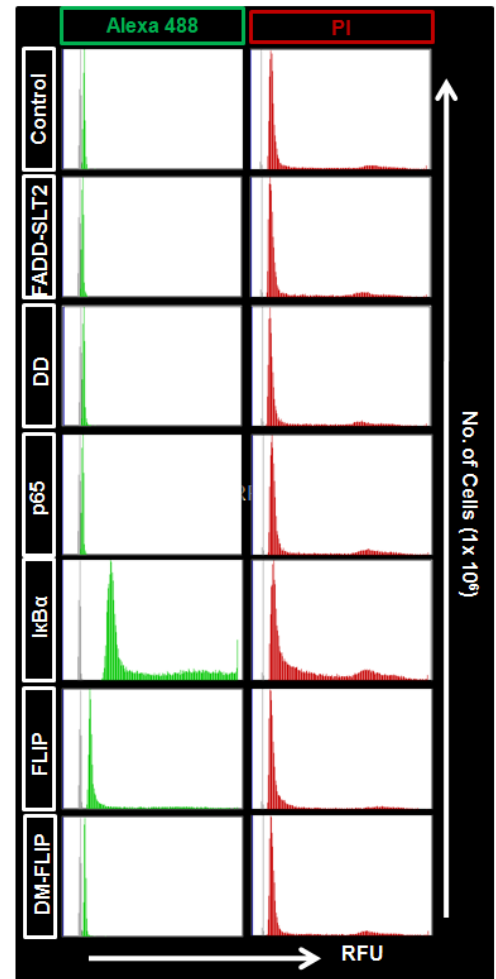

(b)

60 **Figure S6. Effects of domains specific mutation in FADD and cFLIP<sub>L</sub> on cell death.** The  
 61 plasmid constructs of wild type (wt) FADD, mutated FADD (FADD-SLT2; **S14G, S16A,**  
 62 **S18G, L20A and T21V**), death domain (DD) of FADD (FADD without DED), wt cFLIP<sub>L</sub>,  
 63 mutated MC159 (FLIP-DM; an analogous of cFLIP<sub>L</sub> unable to activate NF-κB signaling) were  
 64 transfected to HEK 293T cells for 48 h and (a) Percent apoptotic death and, (b) Annexin-V-alexa  
 65 488/PI staining, detected by Tali cytometer, Error bars represent mean ± SD, \*P ≤ 0.05, n ≥ 3,  
 66 where n is number of independent experiment.

67

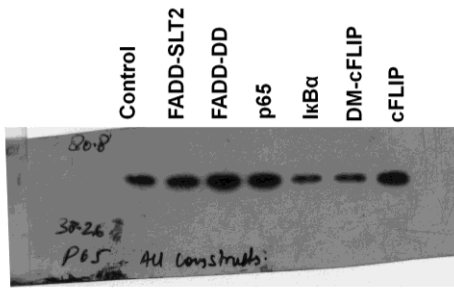

(a)

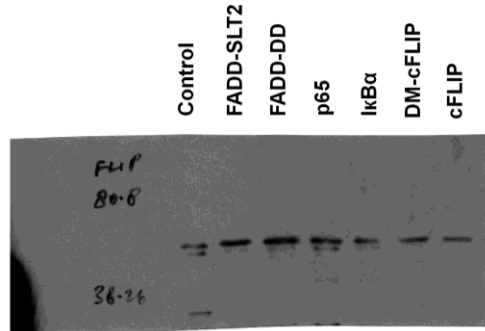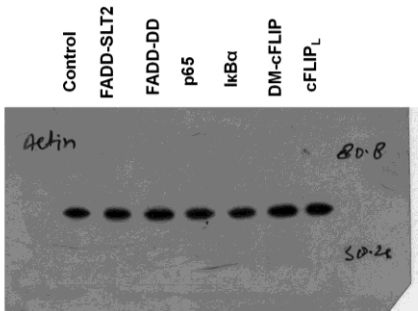

(c)

68 **Figure S7.** The uncropped full-length image of western blot results for Figure 3c. The  
69 chemiluminescent signals from the exposed membrane were recorded on X-ray films.

70



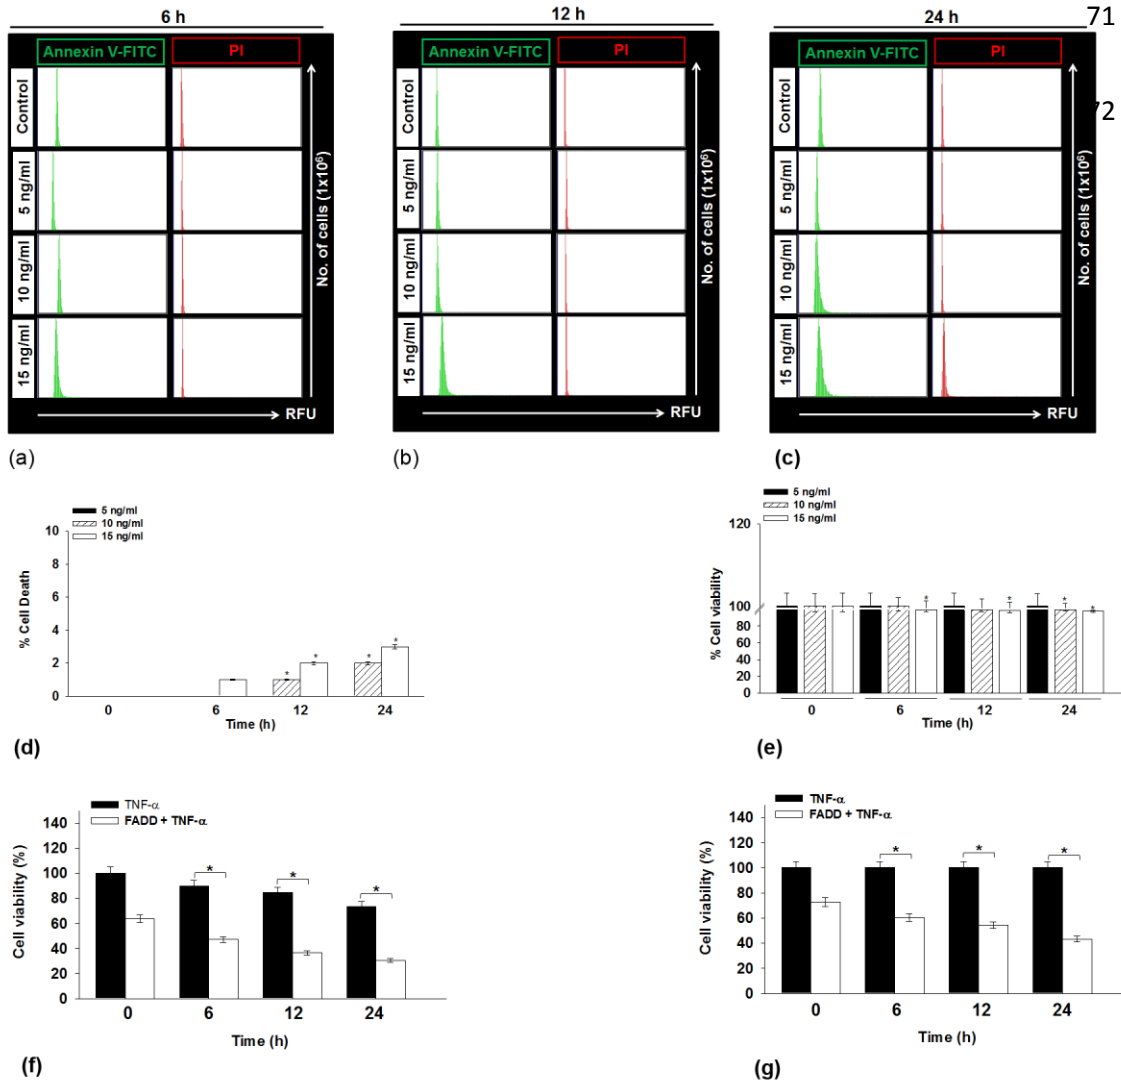

73 **Figure S8. Over expression of FADD commences cell death, independent of TNF- $\alpha$**   
 74 **stimulation.** HEK 293T cells were treated with TNF- $\alpha$  (5, 10 and 15 ng/ml) for 6-24 h. Cell  
 75 death was examined by Annexin V /PI staining detection by automated cell counter Tali<sup>TM</sup> (a) 6  
 76 h, (b) 12 h, (c) 24 h, (d) Percent cell death by by automated cell counter Tali<sup>TM</sup> and (f) TNF- $\alpha$   
 77 (10 ng/ml) stimulation to 48 h of pcDNA-FADD transfected cells to monitor the cell viability in  
 78 (a) MCF-7, (g) HCT 116 cells and compared with TNF- $\alpha$  treated non-transfected cells. TNF- $\alpha$   
 79 untreated and 48 h of FADD expressed cells (shown as 0 h time) were taken as controls. Error  
 80 bars represent mean $\pm$ SD, \*P  $\leq$ 0.05, n  $\geq$  3, where n is number of independent experiment.

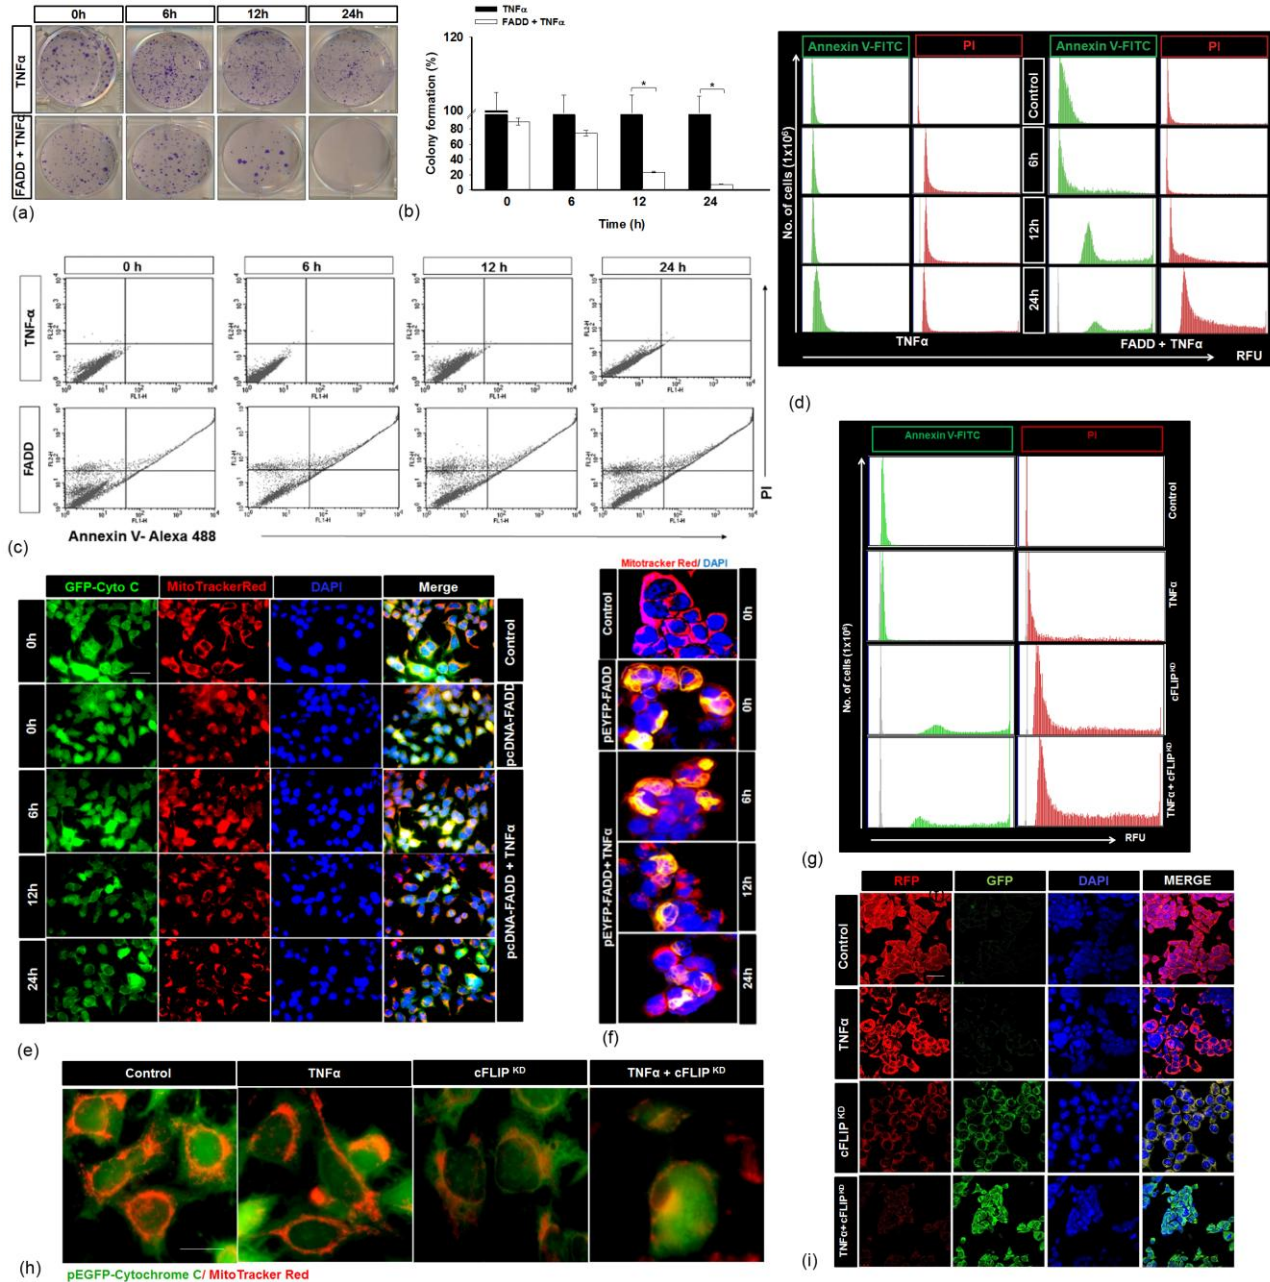

81

82 **Figure S9. Ablation of NF- $\kappa$ B activation and cFLIP<sub>L</sub> expression commences apoptotic cell**  
 83 **death.** TNF- $\alpha$  (10 ng/ml) stimulation to HEK 293T cells and 48 h of pcDNA-FADD expressed  
 84 HEK 293T cells. (a) Colony forming assay, (b) Percent crystal violet stained colonies (c) FACS  
 85 analysis of individually TNF- $\alpha$  treated and FADD expressed cells by BD FACSCalibur™, (d)

86 Annexin-V-FITC/PI staining detection by Tali cytometer, (e) The pEGFP-cytochrome c stable  
87 HEK 293T cells were transfected with pcDNA-FADD (48 h) and further stimulated with TNF- $\alpha$   
88 (10 ng/ml) (f) HEK 293T cells were transfected with pEYFP-FADD (48 h) and treated with  
89 TNF- $\alpha$  (10 ng/ml), post incubation cells were stained with MitoTracker Red and counterstained  
90 with DAPI, the cells were analyzed under fluorescent microscope, control represents vector  
91 transfected cells (shown as 0 min time), scale bar- 5 $\mu$ m. HEK 293T cells were treated with,  
92 TNF- $\alpha$  (10 ng/ml) for 12 h (*lane 2*), siRNA-cFLIP<sub>L</sub> (cFLIP<sub>L</sub><sup>KD</sup>; *lane 3*) for 48 h and TNF- $\alpha$  (10  
93 ng/ml) primed (12 h) cells followed by siRNA-cFLIP<sub>L</sub> (TNF- $\alpha$  + cFLIP<sub>L</sub><sup>KD</sup>; *lane 4*) transfection  
94 for an additional 48 h, post incubation, (g) Annexin-V-FITC/PI staining detection by Tali  
95 cytometer (h) Qualitative analysis of mitochondrial integrity on pEGFP-cytochrome c stable  
96 cells, (i) JC-1 staining. Error bars represent mean $\pm$ SD, \*P  $\leq$ 0.05, n  $\geq$  3, where n is number of  
97 independent experiment.

98

99

100

101

102

103

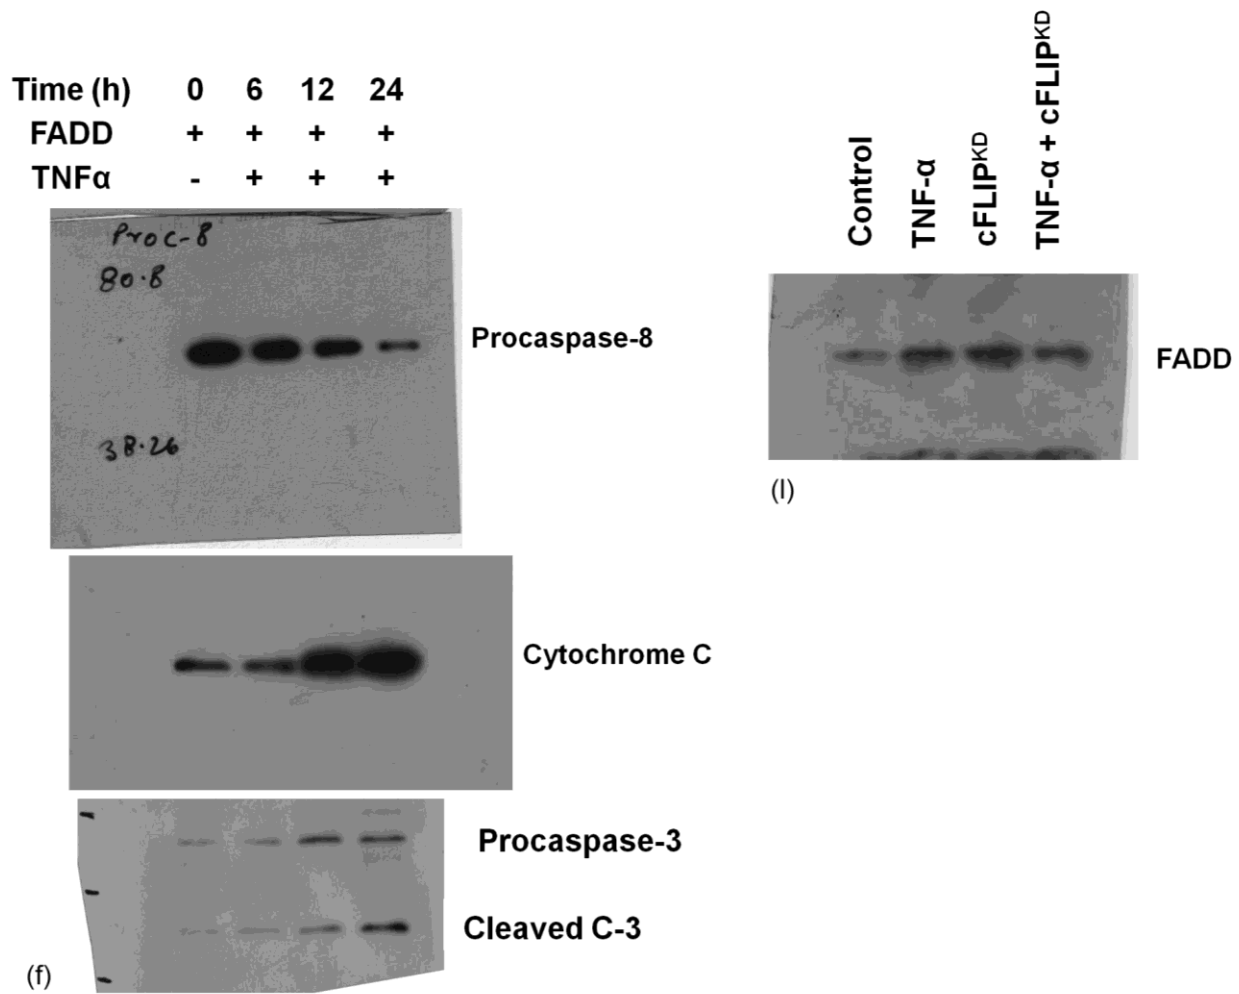

104 **Figure S10.** The uncropped full-length image of western blot results for Figure 4f & 1. The  
 105 chemiluminescent signals from the exposed membrane were recorded on X-ray films.

106

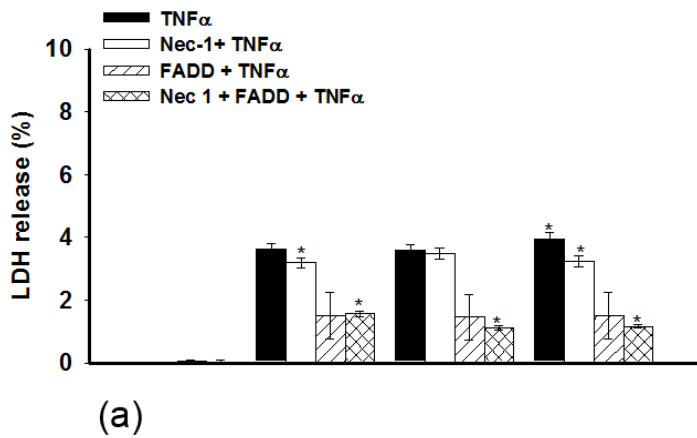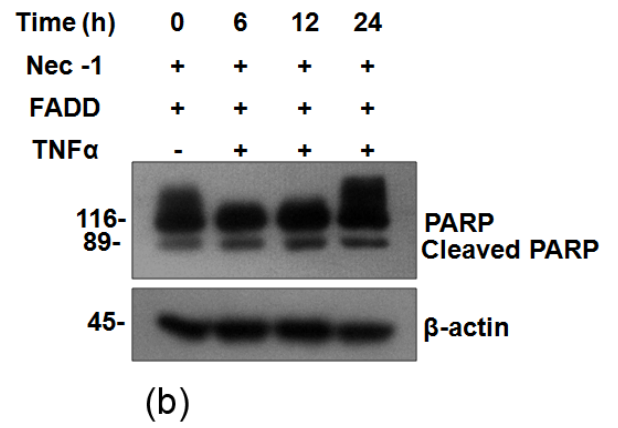

107 **Figure S11. FADD suppresses necrotic death.** HEK 293T cells were pretreated with Necrostatin-1  
 108 (20 $\mu$ M) for 18 h and further stimulated with TNF- $\alpha$  (10 ng/ml) in HEK 293T and 48 h of pcDNA-FADD  
 109 expressed HEK 293T cells to monitor (a) Percent LDH release and, (b) Cells were lyzed and the  
 110 activation of PARP was monitored by western blot analysis. Control represents untreated and FADD  
 111 expressed cells for 48 h (shown as 0 min time). Error bars represent mean $\pm$ SD, \*P  $\leq$ 0.05, n  $\geq$  3,  
 112 where n is number of independent experiment.

113  
 114  
 115  
 116

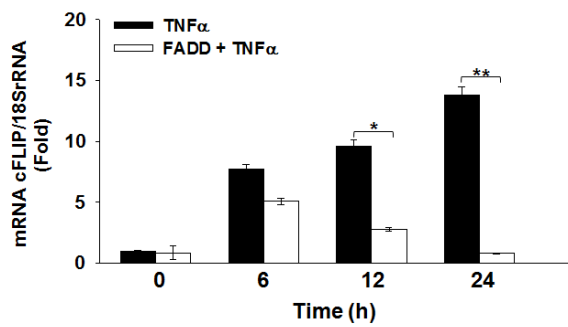

(a)

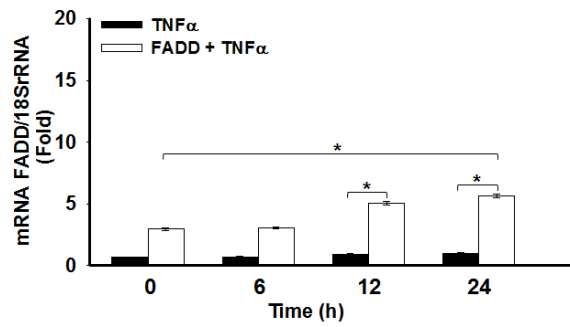

(b)

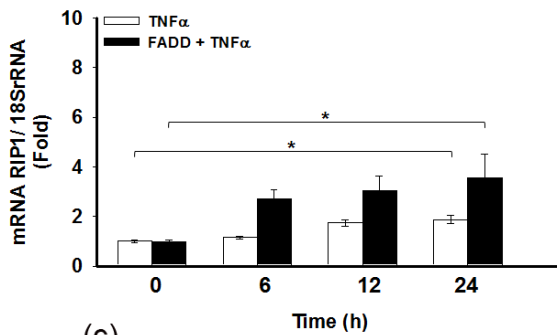

(c)

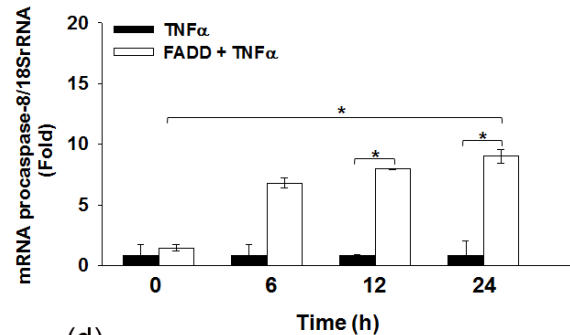

(d)

117 **Figure S12. FADD regulates expression of apoptotic components.** TNF- $\alpha$  (10 ng/ml)  
 118 stimulation to HEK 293T and 48 h of pcDNA-FADD expressed HEK 293T cells to analyze the  
 119 (a) mRNA expression of cFLIP<sub>L</sub> (b) mRNA expression of FADD (c) mRNA expression of RIP1  
 120 and (d) mRNA expression of Procaspase-8. The values were normalized by using the difference  
 121 in critical thresholds ( $C_T$ ) between target gene and 18SrRNA (endogenous control). The  
 122 expression of mRNA of the respective genes was compared with untreated and 48 h of FADD  
 123 expressed cells (shown as 0 min time) control using the values of  $2^{-\Delta\Delta C_T}$ . Error bars represent  
 124 mean $\pm$ SD, \*P  $\leq$ 0.05, \*\*P  $\leq$ 0.001, n  $\geq$  3, where n is number of independent experiment.

125

126

|              |   |   |    |    |
|--------------|---|---|----|----|
| Time (h)     | 0 | 6 | 12 | 24 |
| FADD         | + | + | +  | +  |
| TNF $\alpha$ | - | + | +  | +  |

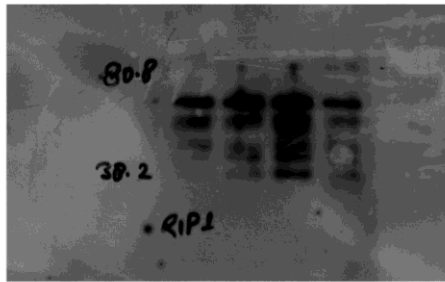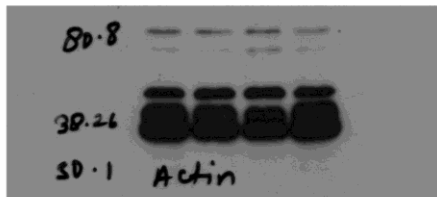

(g)

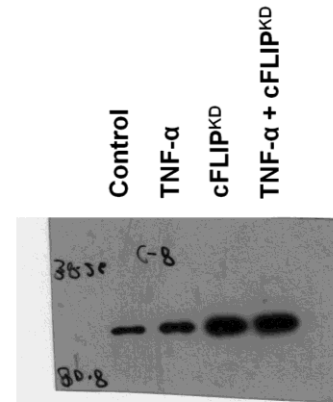

(i)

127 **Figure S13.** The uncropped full-length image of western blot results for Figure 5g & i. The  
 128 chemiluminescent signals from the exposed membrane were recorded on X-ray films.

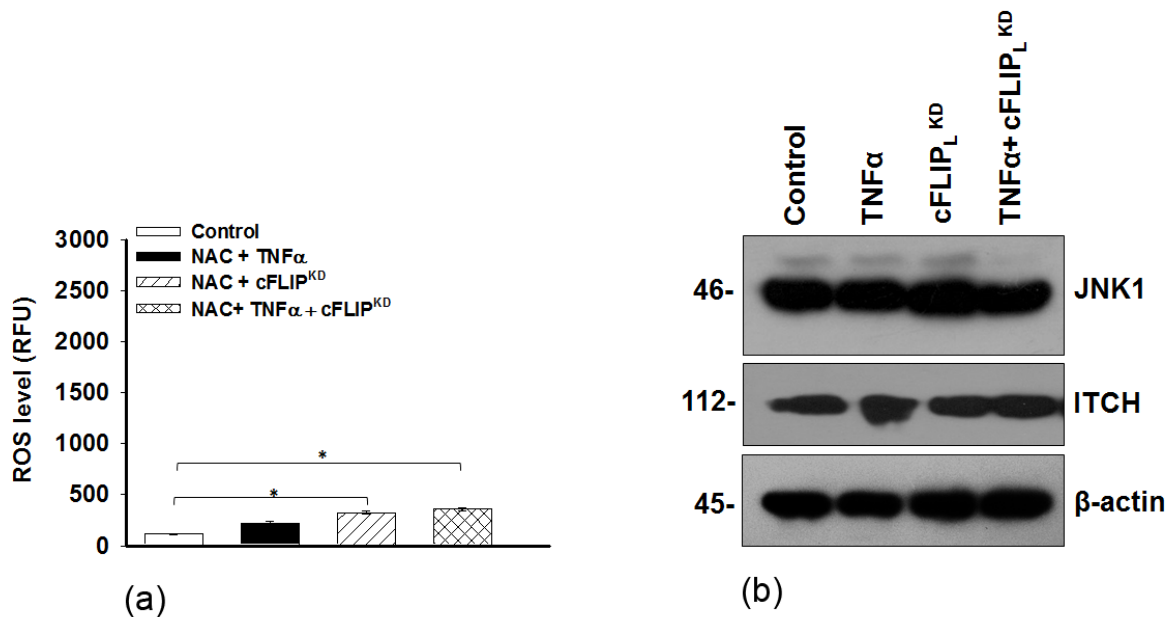

129 **Figure S14. NAC pretreatment restore ROS mediated JNK activation.** HEK 293T cells were  
 130 pretreated with NAC (25 $\mu$ M) for 3h and further stimulated with TNF- $\alpha$  (10 ng/ml) for 12 h (*bar*  
 131 2), transfected with siRNA-cFLIP<sub>L</sub> (cFLIP<sub>L</sub><sup>KD</sup>; *bar 3*) for 48 h and TNF- $\alpha$  (10 ng/ml) primed (12  
 132 h) cells transfected with siRNA-cFLIP<sub>L</sub> (TNF- $\alpha$  + cFLIP<sub>L</sub><sup>KD</sup>; *bar 4*) for an additional 48 h. Post  
 133 incubation the (a) ROS measurement and (b) Western blot analysis of JNK1 and ITCH. The  
 134 uncropped full-length blot of JNK1 is presented in supplementary Figure S15. Error bars  
 135 represent mean $\pm$ SD, \*P  $\leq$  0.05, n  $\geq$  3, where n is number of independent experiment.

136

137



| Time (h)     | + ve control | 0 | 6 | 12 | 24 |
|--------------|--------------|---|---|----|----|
| HA-Ub        | +            | + | + | +  | +  |
| FADD         | +            | + | + | +  | +  |
| MG132        | +            | + | + | +  | +  |
| TNF $\alpha$ | -            | + | + | +  | +  |

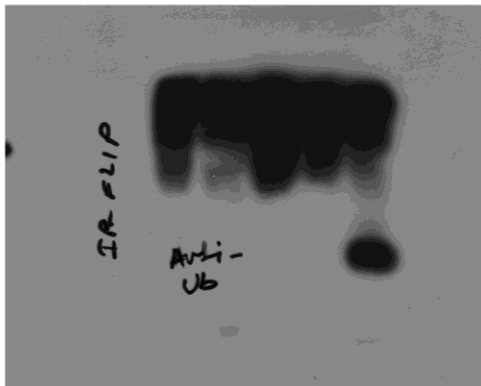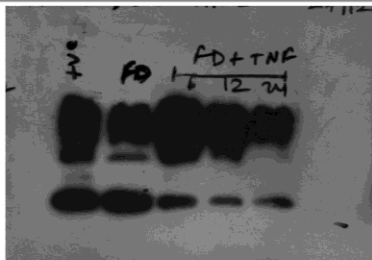

(h)

| Time (h)     | 0 | 6 | 12 | 24 |
|--------------|---|---|----|----|
| FADD         | + | + | +  | +  |
| TNF $\alpha$ | - | + | +  | +  |
| NAC          | + | + | +  | +  |

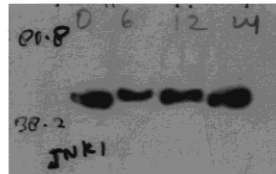

(j)

Control  
TNF- $\alpha$   
cFLIP<sup>KD</sup>  
TNF- $\alpha$  + cFLIP<sup>KD</sup>

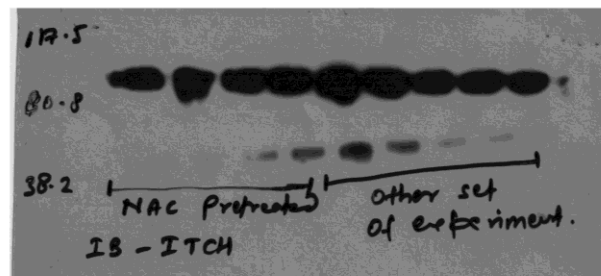

(Figure S13b)

138 **Figure S15.** The uncropped full-length image of western blot results for Figure 6h & j and  
 139 supplementary fig S13b. The positive control represents cycloheximide (5 $\mu$ g/ml for 8 h) treated  
 140 HEK 293T cells. The chemiluminescent signals from the exposed membrane were recorded on  
 141 X-ray films.
